# Supplementary material for: Characterization of pullulanase (PUL)-deficient mutants of rice (Oryza sativa L.) and the function of PUL on starch biosynthesis in the developing rice endosperm
Source: PubMed Central journal article supplement — J Exp Bot. 2009 Mar;60(3):1009–23. doi: 10.1093/jxb/ern349 (PMC2652056; doi:10.1093/jxb/ern349), 2009-03
Supplement: ern349_1.pdf [file ern349_1.pdf]

**Characterisation of PUL-deficient mutants of rice (*Oryza sativa* L.) and the function of PUL on the starch biosynthesis in the developing rice endosperm**

*Naoko Fujita<sup>1,2,7</sup>, Yoshiko Toyosawa<sup>2,3</sup>, Yoshinori Utsumi<sup>1</sup>, Toshiyuki Higuchi<sup>4</sup>, Isao Hanashiro<sup>4</sup>, Jun Ikegami<sup>5</sup>, Sayuri Akuzawa<sup>5</sup>, Mayumi Yoshida<sup>1</sup>, Akiko Mori<sup>1</sup>, Kotaro Inomata<sup>1</sup>, Rumiko Itoh<sup>1</sup>, Akio Miyao<sup>6</sup>, Hirohiko Hirochika<sup>6</sup>, Hikaru Satoh<sup>3</sup>, Yasunori Nakamura<sup>1</sup>*

**Supplementary Material**

Table S1. Primer list for sequencing analysis of *Os* PUL gene.

| primer name | sequence |                           |     |
|-------------|----------|---------------------------|-----|
| pul-1 F     | 5'-      | TTGTCTCTTGCACCAAAAACG     | -3' |
| pul-1 R     | 5'-      | GTTGTTGTTGCTTCGCCATT      | -3' |
| pul-2 F     | 5'-      | GCTTACCCCGAAGCTCCTAC      | -3' |
| pul-2 R     | 5'-      | GCCTGTGGAAACAAGTCCAT      | -3' |
| pul-3 F     | 5'-      | CGCATTGGACCTATATTGGAA     | -3' |
| pul-3 R     | 5'-      | TCACGTGTTGCAAGGGATAA      | -3' |
| pul-4 F     | 5'-      | GGAGATCGTGACATTAACATGC    | -3' |
| pul-4 R     | 5'-      | TTGGAAACGCAAAGTGTGAG      | -3' |
| pul-5 F     | 5'-      | TCTTTGGCTGACTCAAAAAGAA    | -3' |
| pul-5 R     | 5'-      | TTTGAGAGGGTTTGGATTTCG     | -3' |
| pul-6 F     | 5'-      | CGAATCCAAACCCTCTCAA       | -3' |
| pul-6 R     | 5'-      | GGGACGACTTTGCAATACCA      | -3' |
| pul-7 F     | 5'-      | TGGGGTTCTTCTGGTATTGC      | -3' |
| pul-7 R     | 5'-      | CGAACCCCTGAAGTGAAACT      | -3' |
| pul-8 F     | 5'-      | TGTCGTCAGCACAAAGAGTGA     | -3' |
| pul-8 R     | 5'-      | ACGAGTACGCACAACAGCAC      | -3' |
| pul-9 F     | 5'-      | GAACTCGAACCAGAACATGC      | -3' |
| pul-9 R     | 5'-      | TGCTTAGTGACGTTCTGCAAG     | -3' |
| pul-10 F    | 5'-      | GGACCACTTGGTGCAGTTTT      | -3' |
| pul-10 R    | 5'-      | GACAATTCATCCCAGGAAGC      | -3' |
| pul-11 F    | 5'-      | TAATTTGGCCAGGCTTTCTG      | -3' |
| pul-11-R    | 5'-      | TTCCAATTGCTTTTGTGTCA      | -3' |
| pul-12 F    | 5'-      | CTGGCTTGACTCATGTTCAATT    | -3' |
| pul-12 R    | 5'-      | TGAACCTGGAGGGAGTTTTG      | -3' |
| pul-13 F    | 5'-      | TGGGGAAATTCATTTACTCTGG    | -3' |
| pul-13 R    | 5'-      | CCGTTCTGCATAGAGCTGAC      | -3' |
| pul-14 F    | 5'-      | TGTATCTTCCATCCTTGTGCTG    | -3' |
| pul-14 R    | 5'-      | AACCCTGTTATGCTGTACTCACC   | -3' |
| pul-15 F    | 5'-      | ACAAAACAGCCATTGTGCAG      | -3' |
| pul-15 R    | 5'-      | GCCCAATTTAAAAGGTCATCC     | -3' |
| pul-16 F    | 5'-      | CGAAAATAGT GCGGCTATGA     | -3' |
| pul-16 R    | 5'-      | ATGATTGATG GGCGTTCAGT     | -3' |
| pul-17 F    | 5'-      | CTTGATGTAGTAAAAGCACTGAACG | -3' |

|          |     |                           |     |
|----------|-----|---------------------------|-----|
| pul-17 R | 5'- | TTTTCAAAAGCGAACAAACTCA    | -3' |
| pul-18 F | 5'- | ACTTTGGTACGTCATCCGTGT     | -3' |
| pul-18 R | 5'- | GATGGTGTATAAACTCCCACCTTT  | -3' |
| pul-19 F | 5'- | CCTGTAAAACCTCAGTCTGGAGAA  | -3' |
| pul-19 R | 5'- | CCCTCGTAAGGCTTCGAATA      | -3' |
| pul-20 F | 5'- | ACTGCATCGCTACTGTGTGC      | -3' |
| pul-20 R | 5'- | CGACTGCATGCATTTTAGGA      | -3' |
| pul-21 F | 5'- | ACTCTTTCCAGCCATAGAAAAAT   | -3' |
| pul-21 R | 5'- | CACGTA CTGATTGTCATCTCCAG  | -3' |
| pul-22 F | 5'- | ACAGCAAGGCTTTTCTACCG      | -3' |
| pul-22 R | 5'- | CATCAACGATCACCAACATCA     | -3' |
| pul-23 F | 5'- | TGGATATGAAGGTGTCTTTTGG    | -3' |
| pul-23 R | 5'- | GGTGACTGGCTGGTTTCAAT      | -3' |
| pul-24 F | 5'- | CCCGTTGCTTTCTTCTAGTGA     | -3' |
| pul-24 R | 5'- | CCAAAACATGAAATGATCAGCA    | -3' |
| pul-25 F | 5'- | CAGGTTGACCACTGGTTGAAT     | -3' |
| pul-25 R | 5'- | AACATAAATTTGGGATAGGCAGA   | -3' |
| pul-26 F | 5'- | CCTTCAGACAAATGCATTCAA     | -3' |
| pul-26 R | 5'- | CCGATCTGGGAAAAGACAAA      | -3' |
| pul-27 F | 5'- | TGTGCTTTCTTACCGTGTTTTC    | -3' |
| pul-27 R | 5'- | CTTGATGAAAAACATCGTACTAGC  | -3' |
| pul-28 F | 5'- | TGAGACTCTGTTTGATATTGTCAGT | -3' |
| pul-28 R | 5'- | GACCTGGGATAATGCGATCA      | -3' |
| pul-29 F | 5'- | TGGCCTATCGATTGATGAGAA     | -3' |
| pul-29 R | 5'- | TGCCTGAACAACCTGAGTCCA     | -3' |
| pul-30 F | 5'- | CTTTCTGCGATCTGCTGTTG      | -3' |
| pul-30 R | 5'- | CACCCCAATTGTTTGTTC        | -3' |
| pul-31 F | 5'- | AATTCGATTTGCTTTGAACAG     | -3' |
| pul-31 R | 5'- | TGTA CTCCATCCATCCCAA      | -3' |
| pul-32 F | 5'- | TTTGGGACAAATCGTGATG       | -3' |
| pul-32 R | 5'- | GCTCCCTGTCTACCATAATGC     | -3' |
| pul-33 F | 5'- | CGCAGAATGAAGTTATCGTGA     | -3' |
| pul-33 R | 5'- | CATACCAGGCATTGCAGTCT      | -3' |
| pul-34 F | 5'- | AAGCATAATTTTGCATGAGCTG    | -3' |
| pul-34 R | 5'- | CCGATGAATTCACCTGAACC      | -3' |
| pul-35 F | 5'- | GTTGAGAGGCGATTTCGATGT     | -3' |
| pul-35 R | 5'- | TGAAACAAAGGGAGCATTTTT     | -3' |
